# Supplementary material for: Association of High-Intensity Binge Drinking With Lipid and Liver Function Enzyme Levels
Source: PubMed Central journal article supplement (PMC6575145; doi:10.1001/jamanetworkopen.2019.5844), 2019-06-14
Supplement: jamanetwopen-2-e195844-s001.pdf [file jamanetwopen-2-e195844-s001.pdf]

## Supplementary Online Content

Rosoff DB, Charlet K, Jung J, et al. Association of high-intensity binge drinking with lipid and liver function enzyme levels. *JAMA Netw Open*. 2019;2(6):e195844. doi:10.1001/jamanetworkopen.2019.5844

**eTable 1.** Clinically High Lipid and LFT Biomarkers by Alcohol Binge Level

**eTable 2.** Logistic Regression Results for Alcohol Binge Levels on Clinically High Lipid and LFT Levels

**eTable 3.** Logistic Regression Results for Alcohol Binge Intake Frequency on Clinically High Lipid and LFT Levels

This supplementary material has been provided by the authors to give readers additional information about their work.

**eTable 1.** Clinically High Lipid and LFT Biomarkers by Alcohol Binge Level

| Biomarker                               | All<br>N=1519 | Non-Binge<br>N=578 | Level I<br>N=321 | Level II<br>N=239 | Level III<br>N=381 | P-overall                |
|-----------------------------------------|---------------|--------------------|------------------|-------------------|--------------------|--------------------------|
| <b>Lipid Biomarkers (mg/dL)</b>         |               |                    |                  |                   |                    |                          |
| Total cholesterol (1 mo)                |               |                    |                  |                   |                    | <.001 <sup>a-c</sup>     |
| < 240                                   | 1369 (90.2%)  | 552 (95.5%)        | 287 (89.4%)      | 204 (85.4%)       | 326 (85.8%)        |                          |
| ≥ 240                                   | 149 (9.82%)   | 26 (4.50%)         | 34 (10.6%)       | 35 (14.6%)        | 54 (14.2%)         |                          |
| HDL cholesterol                         |               |                    |                  |                   |                    | <.001 <sup>a-c,e,f</sup> |
| < 100                                   | 1383 (91.0%)  | 563 (97.4%)        | 294 (91.6%)      | 214 (89.5%)       | 312 (81.9%)        |                          |
| ≥ 100                                   | 136 (8.95%)   | 15 (2.60%)         | 27 (8.41%)       | 25 (10.5%)        | 69 (18.1%)         |                          |
| LDL cholesterol (9 mo)                  |               |                    |                  |                   |                    | .002 <sup>b,c</sup>      |
| < 160                                   | 1425 (94.4%)  | 560 (96.9%)        | 303 (94.7%)      | 214 (90.7%)       | 348 (92.6%)        |                          |
| ≥ 160                                   | 85 (5.63%)    | 18 (3.11%)         | 17 (5.31%)       | 22 (9.32%)        | 28 (7.45%)         |                          |
| Triglycerides                           |               |                    |                  |                   |                    | <.001 <sup>a-c</sup>     |
| < 200                                   | 1386 (91.2%)  | 556 (96.2%)        | 286 (89.1%)      | 211 (88.3%)       | 333 (87.4%)        |                          |
| ≥ 200                                   | 133 (8.76%)   | 22 (3.81%)         | 35 (10.9%)       | 28 (11.7%)        | 48 (12.6%)         |                          |
| <b>LFT Biomarkers (IU/L)</b>            |               |                    |                  |                   |                    |                          |
| Alanine Aminotransferase (ALT)          |               |                    |                  |                   |                    | <.001 <sup>a-c,e</sup>   |
| < 25 females; < 40 males                | 974 (64.1%)   | 477 (82.5%)        | 198 (61.7%)      | 129 (54.0%)       | 170 (44.6%)        |                          |
| ≥ 25 females; ≥ 40 males                | 545 (35.9%)   | 101 (17.5%)        | 123 (38.3%)      | 110 (46.0%)       | 211 (55.4%)        |                          |
| Aspartate Aminotransferase (AST) (2 mo) |               |                    |                  |                   |                    | <.001 <sup>a-c</sup>     |
| < 34                                    | 1078 (71.1%)  | 527 (91.2%)        | 221 (68.8%)      | 138 (57.7%)       | 192 (50.7%)        |                          |
| ≥ 34                                    | 439 (28.9%)   | 51 (8.82%)         | 100 (31.2%)      | 101 (42.3%)       | 187 (49.3%)        |                          |
| Gamma-glutamyltransferase (GGT)         |               |                    |                  |                   |                    | <.001 <sup>a-c</sup>     |
| < 30                                    | 662 (43.6%)   | 405 (70.1%)        | 128 (39.9%)      | 57 (23.8%)        | 72 (18.9%)         |                          |
| ≥ 30                                    | 857 (56.4%)   | 173 (29.9%)        | 193 (60.1%)      | 182 (76.2%)       | 309 (81.1%)        |                          |

Notes: Number of cases of clinically high levels (%) reported. Participants with missing observations (mo) were excluded from multivariable analyses. Abbreviations: HDL: high-density lipoprotein; LDL: low-density lipoprotein; mg/dL: milligrams per deciliter; IU/L: International Unit per Liter; LFT: liver function tests. Pairwise comparisons significant at Bonferroni adjusted threshold  $P < .001$  denoted: “a” non-binge v. level I; “b” non-binge v. level II; “c” non-binge v. level III; “d” level I v. II; “e” level I v. III; “f” level II v. III.

| eTable 2. Logistic Regression Results for Alcohol Binge Levels on Clinically High Lipid and LFT Levels |               |       |        |          |        |        |       |        |        |        |        |        |        |          |
|--------------------------------------------------------------------------------------------------------|---------------|-------|--------|----------|--------|--------|-------|--------|--------|--------|--------|--------|--------|----------|
|                                                                                                        |               |       |        |          |        |        |       |        |        |        |        |        |        |          |
|                                                                                                        |               |       |        |          |        |        |       |        |        |        |        |        |        |          |
| Adjustment: Bonferroni method for 42 comparisons                                                       |               |       |        |          |        |        |       |        |        |        |        |        |        |          |
| Predictors                                                                                             | Estimate      | SE    | Z      | Pr(> z ) | LCI    | UCI    | OR    | OR LCI | OR UCI | LCI    | UCI    | OR LCI | OR LCI | P value  |
| <b>Outcome: Clinically High HDL-C</b>                                                                  |               |       |        |          |        |        |       |        |        |        |        |        |        |          |
| (Intercept)                                                                                            | -1.589        | 0.665 | -2.388 | 1.70E-02 | -2.893 | -0.285 | 0.204 | 0.055  | 0.752  | -3.745 | 0.568  | 0.024  | 1.764  | 7.12E-01 |
| Level I alcohol consumption                                                                            | 1.214         | 0.338 | 3.588  | 3.33E-04 | 0.551  | 1.876  | 3.365 | 1.734  | 6.531  | 0.117  | 2.310  | 1.124  | 10.073 | 1.00E+00 |
| Level II alcohol consumption                                                                           | 1.502         | 0.348 | 4.315  | 1.60E-05 | 0.820  | 2.184  | 4.491 | 2.270  | 8.885  | 0.374  | 2.630  | 1.453  | 13.878 | 6.72E-04 |
| Level III alcohol consumption                                                                          | 2.158         | 0.306 | 7.047  | 1.83E-12 | 1.558  | 2.758  | 8.652 | 4.747  | 15.767 | 1.165  | 3.150  | 3.207  | 23.340 | 7.69E-11 |
| Age                                                                                                    | 0.018         | 0.009 | 2.132  | 3.30E-02 | 0.001  | 0.035  | 1.018 | 1.001  | 1.036  | -0.010 | 0.046  | 0.991  | 1.047  | 1.00E+00 |
| Race: Black/ African-American                                                                          | 0.038         | 0.195 | 0.196  | 8.44E-01 | -0.344 | 0.420  | 1.039 | 0.709  | 1.522  | -0.593 | 0.670  | 0.553  | 1.954  | 1.00E+00 |
| Race: Asian                                                                                            | 0.103         | 0.640 | 0.160  | 8.72E-01 | -1.151 | 1.356  | 1.108 | 0.316  | 3.882  | -1.971 | 2.176  | 0.139  | 8.810  | 1.00E+00 |
| Race: American Indian/ Native American                                                                 | -0.242        | 1.151 | -0.210 | 8.34E-01 | -2.498 | 2.014  | 0.785 | 0.082  | 7.491  | -3.972 | 3.488  | 0.019  | 32.726 | 1.00E+00 |
| Multiracial                                                                                            | -0.347        | 0.751 | -0.462 | 6.44E-01 | -1.819 | 1.125  | 0.707 | 0.162  | 3.081  | -2.782 | 2.088  | 0.062  | 8.065  | 1.00E+00 |
| Gender: Male                                                                                           | -0.428        | 0.197 | -2.172 | 2.98E-02 | -0.814 | -0.042 | 0.652 | 0.443  | 0.959  | -1.067 | 0.211  | 0.344  | 1.234  | 1.00E+00 |
| BMI                                                                                                    | -0.099        | 0.022 | -4.440 | 9.01E-06 | -0.142 | -0.055 | 0.906 | 0.868  | 0.946  | -0.171 | -0.027 | 0.843  | 0.974  | 3.78E-04 |
|                                                                                                        |               |       |        |          |        |        |       |        |        |        |        |        |        |          |
| Null Deviance (df)                                                                                     | 915.82 (1518) |       |        |          |        |        |       |        |        |        |        |        |        |          |
| Residual Deviance (df)                                                                                 | 812.51 (1508) |       |        |          |        |        |       |        |        |        |        |        |        |          |
| Observations deleted due to missingness                                                                | 0             |       |        |          |        |        |       |        |        |        |        |        |        |          |
| AIC                                                                                                    | 834.51        |       |        |          |        |        |       |        |        |        |        |        |        |          |
| Hoslem-Lemeshow Goodness of Fit: P-value                                                               | > 0.99        |       |        |          |        |        |       |        |        |        |        |        |        |          |
|                                                                                                        |               |       |        |          |        |        |       |        |        |        |        |        |        |          |
| Adjustment: Bonferroni method for 42 comparisons                                                       |               |       |        |          |        |        |       |        |        |        |        |        |        |          |
| Outcome: Clinically High LDL-C                                                                         | Estimate      | SE    | Z      | Pr(> z ) | LCI    | UCI    | OR    | OR LCI | OR UCI | LCI    | UCI    | OR LCI | OR LCI | P value  |
| (Intercept)                                                                                            | -7.285        | 0.803 | -9.071 | 2.00E-16 | -8.859 | -5.711 | 0.001 | 0.000  | 0.003  | -9.888 | -4.682 | 0.000  | 0.009  | 8.40E-15 |
| Level I alcohol consumption                                                                            | 0.309         | 0.355 | 0.872  | 3.83E-01 | -0.386 | 1.004  | 1.362 | 0.680  | 2.730  | -0.840 | 1.459  | 0.432  | 4.300  | 1.00E+00 |
| Level II alcohol consumption                                                                           | 0.880         | 0.340 | 2.593  | 9.52E-03 | 0.215  | 1.546  | 2.412 | 1.240  | 4.693  | -0.220 | 1.981  | 0.802  | 7.250  | 4.00E-01 |
| Level III alcohol consumption                                                                          | 0.678         | 0.321 | 2.110  | 3.48E-02 | 0.048  | 1.307  | 1.969 | 1.049  | 3.696  | -0.363 | 1.719  | 0.695  | 5.578  | 1.00E+00 |
| Age                                                                                                    | 0.052         | 0.011 | 4.870  | 1.12E-06 | 0.031  | 0.073  | 1.053 | 1.031  | 1.075  | 0.017  | 0.086  | 1.017  | 1.090  | 4.70E-05 |
| Race: Black/ African-American                                                                          | -0.167        | 0.238 | -0.702 | 4.83E-01 | -0.633 | 0.299  | 0.846 | 0.531  | 1.349  | -0.938 | 0.604  | 0.391  | 1.829  | 1.00E+00 |
| Race: Asian                                                                                            | -0.250        | 1.041 | -0.241 | 8.10E-01 | -2.290 | 1.789  | 0.778 | 0.101  | 5.986  | -3.623 | 3.123  | 0.027  | 22.706 | 1.00E+00 |
| Race: American Indian/ Native American                                                                 | 0.053         | 1.113 | 0.047  | 9.62E-01 | -2.129 | 2.235  | 1.054 | 0.119  | 9.345  | -3.556 | 3.661  | 0.029  | 38.905 | 1.00E+00 |
| Multiracial                                                                                            | -0.898        | 1.036 | -0.867 | 3.86E-01 | -2.928 | 1.132  | 0.407 | 0.053  | 3.100  | -4.255 | 2.458  | 0.014  | 11.686 | 1.00E+00 |
| Gender: Male                                                                                           | -0.053        | 0.246 | -0.214 | 8.30E-01 | -0.534 | 0.429  | 0.949 | 0.586  | 1.535  | -0.848 | 0.743  | 0.428  | 2.103  | 1.00E+00 |
| BMI                                                                                                    | 0.069         | 0.020 | 3.469  | 5.22E-04 | 0.030  | 0.108  | 1.071 | 1.030  | 1.114  | 0.005  | 0.133  | 1.005  | 1.143  | 2.19E-02 |
|                                                                                                        |               |       |        |          |        |        |       |        |        |        |        |        |        |          |
| Null Deviance (df)                                                                                     | 654.25 (1509) |       |        |          |        |        |       |        |        |        |        |        |        |          |
| Residual Deviance (df)                                                                                 | 597.61 (1499) |       |        |          |        |        |       |        |        |        |        |        |        |          |
| Observations deleted due to missingness                                                                | 9             |       |        |          |        |        |       |        |        |        |        |        |        |          |
| AIC                                                                                                    | 619.61        |       |        |          |        |        |       |        |        |        |        |        |        |          |
| Hoslem-Lemeshow Goodness of Fit: P-value                                                               | > 0.99        |       |        |          |        |        |       |        |        |        |        |        |        |          |

|                                                   |                 |           |          |                    |            |            |           |               |               | Adjustment: Bonferroni method for 42 comparisons |            |               |               |                |
|---------------------------------------------------|-----------------|-----------|----------|--------------------|------------|------------|-----------|---------------|---------------|--------------------------------------------------|------------|---------------|---------------|----------------|
| <b>Outcome: Clinically High Total Cholesterol</b> | <b>Estimate</b> | <b>SE</b> | <b>Z</b> | <b>Pr(&gt; z )</b> | <b>LCI</b> | <b>UCI</b> | <b>OR</b> | <b>OR LCI</b> | <b>OR UCI</b> | <b>LCI</b>                                       | <b>UCI</b> | <b>OR LCI</b> | <b>OR LCI</b> | <b>P value</b> |
| (Intercept)                                       | -5.086          | 0.597     | -8.520   | 2.00E-16           | -6.256     | -3.916     | 0.006     | 0.002         | 0.020         | -7.020                                           | -3.151     | 0.001         | 0.043         | 8.40E-15       |
| Level I alcohol consumption                       | 0.747           | 0.277     | 2.694    | 7.07E-03           | 0.203      | 1.291      | 2.111     | 1.226         | 3.635         | -0.152                                           | 1.646      | 0.859         | 5.186         | 2.97E-01       |
| Level II alcohol consumption                      | 1.070           | 0.280     | 3.816    | 1.36E-04           | 0.521      | 1.620      | 2.916     | 1.683         | 5.054         | 0.161                                            | 1.979      | 1.175         | 7.239         | 5.71E-03       |
| Level III alcohol consumption                     | 1.052           | 0.257     | 4.098    | 4.17E-05           | 0.549      | 1.555      | 2.863     | 1.731         | 4.734         | 0.220                                            | 1.884      | 1.246         | 6.578         | 1.75E-03       |
| Age                                               | 0.040           | 0.008     | 5.032    | 4.86E-07           | 0.025      | 0.056      | 1.041     | 1.025         | 1.058         | 0.014                                            | 0.066      | 1.014         | 1.068         | 2.04E-05       |
| Race: Black/ African-American                     | -0.458          | 0.188     | -2.437   | 1.48E-02           | -0.826     | -0.090     | 0.633     | 0.438         | 0.914         | -1.067                                           | 0.151      | 0.344         | 1.163         | 6.23E-01       |
| Race: Asian                                       | -0.406          | 0.746     | -0.544   | 5.87E-01           | -1.868     | 1.057      | 0.667     | 0.154         | 2.878         | -2.824                                           | 2.013      | 0.059         | 7.486         | 1.00E+00       |
| Race: American Indian/ Native American            | -0.641          | 1.099     | -0.583   | 5.60E-01           | -2.794     | 1.513      | 0.527     | 0.061         | 4.539         | -4.202                                           | 2.920      | 0.015         | 18.546        | 1.00E+00       |
| Multiracial                                       | -0.868          | 0.746     | -1.163   | 2.45E-01           | -2.330     | 0.595      | 0.420     | 0.097         | 1.813         | -3.286                                           | 1.551      | 0.037         | 4.716         | 1.00E+00       |
| Gender: Male                                      | -0.232          | 0.187     | -1.240   | 2.15E-01           | -0.597     | 0.134      | 0.793     | 0.550         | 1.144         | -0.837                                           | 0.374      | 0.433         | 1.453         | 1.00E+00       |
| BMI                                               | 0.030           | 0.017     | 1.829    | 6.75E-02           | -0.002     | 0.063      | 1.031     | 0.998         | 1.065         | -0.024                                           | 0.084      | 0.977         | 1.088         | 1.00E+00       |
|                                                   |                 |           |          |                    |            |            |           |               |               |                                                  |            |               |               |                |
| Null Deviance (df)                                | 974.59 (1517)   |           |          |                    |            |            |           |               |               |                                                  |            |               |               |                |
| Residual Deviance (df)                            | 899.68 (1507)   |           |          |                    |            |            |           |               |               |                                                  |            |               |               |                |
| Observations deleted due to missingness           | 2               |           |          |                    |            |            |           |               |               |                                                  |            |               |               |                |
| AIC                                               | 921.68          |           |          |                    |            |            |           |               |               |                                                  |            |               |               |                |
| Hoslem-Lemeshow Goodness of Fit: P-value          | > 0.99          |           |          |                    |            |            |           |               |               |                                                  |            |               |               |                |
|                                                   |                 |           |          |                    |            |            |           |               |               | Adjustment: Bonferroni method for 42 comparisons |            |               |               |                |
| <b>Outcome: Clinically High Triglycerides</b>     | <b>Estimate</b> | <b>SE</b> | <b>Z</b> | <b>Pr(&gt; z )</b> | <b>LCI</b> | <b>UCI</b> | <b>OR</b> | <b>OR LCI</b> | <b>OR UCI</b> | <b>LCI</b>                                       | <b>UCI</b> | <b>OR LCI</b> | <b>OR LCI</b> | <b>P value</b> |
| (Intercept)                                       | -6.426          | 0.642     | -10.017  | 2.00E-16           | -7.684     | -5.169     | 0.002     | 0.000         | 0.006         | -8.505                                           | -4.347     | 0.000         | 0.013         | 8.40E-15       |
| Level I alcohol consumption                       | 1.055           | 0.291     | 3.629    | 2.84E-04           | 0.485      | 1.625      | 2.872     | 1.625         | 5.078         | 0.113                                            | 1.997      | 1.119         | 7.370         | 1.19E-02       |
| Level II alcohol consumption                      | 1.069           | 0.310     | 3.447    | 5.67E-04           | 0.461      | 1.677      | 2.913     | 1.586         | 5.350         | 0.064                                            | 2.074      | 1.066         | 7.960         | 2.38E-02       |
| Level III alcohol consumption                     | 1.085           | 0.279     | 3.891    | 9.97E-05           | 0.538      | 1.631      | 2.959     | 1.713         | 5.111         | 0.181                                            | 1.989      | 1.199         | 7.305         | 4.19E-03       |
| Age                                               | 0.008           | 0.008     | 0.954    | 3.40E-01           | -0.008     | 0.024      | 1.008     | 0.992         | 1.024         | -0.019                                           | 0.035      | 0.981         | 1.035         | 1.00E+00       |
| Race: Black/ African-American                     | -0.794          | 0.208     | -3.824   | 1.31E-04           | -1.200     | -0.387     | 0.452     | 0.301         | 0.679         | -1.466                                           | -0.121     | 0.231         | 0.886         | 5.50E-03       |
| Race: Asian                                       | 0.217           | 0.564     | 0.386    | 7.00E-01           | -0.888     | 1.323      | 1.243     | 0.412         | 3.754         | -1.610                                           | 2.045      | 0.200         | 7.733         | 1.00E+00       |
| Race: American Indian/ Native American            | 0.068           | 1.122     | 0.060    | 9.52E-01           | -2.132     | 2.268      | 1.070     | 0.119         | 9.657         | -3.570                                           | 3.706      | 0.028         | 40.679        | 1.00E+00       |
| Multiracial                                       | -0.877          | 0.750     | -1.171   | 2.42E-01           | -2.347     | 0.592      | 0.416     | 0.096         | 1.807         | -3.307                                           | 1.552      | 0.037         | 4.721         | 1.00E+00       |
| Gender: Male                                      | 0.642           | 0.225     | 2.852    | 4.34E-03           | 0.201      | 1.084      | 1.901     | 1.222         | 2.955         | -0.088                                           | 1.372      | 0.916         | 3.943         | 1.82E-01       |
| BMI                                               | 0.102           | 0.017     | 6.060    | 1.36E-09           | 0.069      | 0.135      | 1.108     | 1.072         | 1.145         | 0.048                                            | 0.157      | 1.049         | 1.170         | 5.71E-08       |
|                                                   |                 |           |          |                    |            |            |           |               |               |                                                  |            |               |               |                |
| Null Deviance (df)                                | 901.83 (1518)   |           |          |                    |            |            |           |               |               |                                                  |            |               |               |                |
| Residual Deviance (df)                            | 815 (1508)      |           |          |                    |            |            |           |               |               |                                                  |            |               |               |                |
| Observations deleted due to missingness           | 0               |           |          |                    |            |            |           |               |               |                                                  |            |               |               |                |
| AIC                                               | 837.00          |           |          |                    |            |            |           |               |               |                                                  |            |               |               |                |
| Hoslem-Lemeshow Goodness of Fit: P-value          | > 0.99          |           |          |                    |            |            |           |               |               |                                                  |            |               |               |                |
|                                                   |                 |           |          |                    |            |            |           |               |               | Adjustment: Bonferroni method for 42 comparisons |            |               |               |                |
| <b>Outcome: Clinically High GGT</b>               | <b>Estimate</b> | <b>SE</b> | <b>Z</b> | <b>Pr(&gt; z )</b> | <b>LCI</b> | <b>UCI</b> | <b>OR</b> | <b>OR LCI</b> | <b>OR UCI</b> | <b>LCI</b>                                       | <b>UCI</b> | <b>OR LCI</b> | <b>OR LCI</b> | <b>P value</b> |
| (Intercept)                                       | -4.269          | 0.400     | -10.681  | 2.00E-16           | -5.052     | -3.485     | 0.014     | 0.006         | 0.031         | -5.564                                           | -2.973     | 0.004         | 0.051         | 8.40E-15       |



|                                                |               |                     |                                                                                                                                                                                      |          |        |       |       |       |       |        |       |       |       |          |
|------------------------------------------------|---------------|---------------------|--------------------------------------------------------------------------------------------------------------------------------------------------------------------------------------|----------|--------|-------|-------|-------|-------|--------|-------|-------|-------|----------|
| Race: Asian                                    | -0.359        | 0.463               | -0.775                                                                                                                                                                               | 4.38E-01 | -1.266 | 0.548 | 0.698 | 0.282 | 1.730 | -1.859 | 1.141 | 0.156 | 3.130 | 1.00E+00 |
| Race: American Indian/ Native American         | -1.144        | 0.874               | -1.310                                                                                                                                                                               | 1.90E-01 | -2.857 | 0.568 | 0.318 | 0.057 | 1.765 | -3.976 | 1.688 | 0.019 | 5.407 | 1.00E+00 |
| Multiracial                                    | -0.867        | 0.460               | -1.886                                                                                                                                                                               | 5.93E-02 | -1.768 | 0.034 | 0.420 | 0.171 | 1.035 | -2.357 | 0.623 | 0.095 | 1.865 | 1.00E+00 |
| Gender: Male                                   | 0.513         | 0.141               | 3.633                                                                                                                                                                                | 2.81E-04 | 0.236  | 0.790 | 1.670 | 1.266 | 2.203 | 0.055  | 0.971 | 1.057 | 2.639 | 1.18E-02 |
| BMI                                            | -0.026        | 0.013               | -1.957                                                                                                                                                                               | 5.03E-02 | -0.052 | 0.000 | 0.974 | 0.950 | 1.000 | -0.069 | 0.017 | 0.934 | 1.017 | 1.00E+00 |
|                                                |               |                     |                                                                                                                                                                                      |          |        |       |       |       |       |        |       |       |       |          |
| Null Deviance (df)                             | 1825.9 (1517) |                     |                                                                                                                                                                                      |          |        |       |       |       |       |        |       |       |       |          |
| Residual Deviance (df)                         | 1503 (1507)   |                     |                                                                                                                                                                                      |          |        |       |       |       |       |        |       |       |       |          |
| Observations deleted due to missingness        | 2             |                     |                                                                                                                                                                                      |          |        |       |       |       |       |        |       |       |       |          |
| AIC                                            | 1525.00       |                     |                                                                                                                                                                                      |          |        |       |       |       |       |        |       |       |       |          |
| Hoslem-Lemeshow Goodness of Fit: P-value       | > 0.99        |                     |                                                                                                                                                                                      |          |        |       |       |       |       |        |       |       |       |          |
| <b>NOTES:</b>                                  |               |                     |                                                                                                                                                                                      |          |        |       |       |       |       |        |       |       |       |          |
| Predictor                                      | Type          | Sex specific        | Definition:                                                                                                                                                                          |          |        |       |       |       |       |        |       |       |       |          |
|                                                |               |                     |                                                                                                                                                                                      |          |        |       |       |       |       |        |       |       |       |          |
|                                                |               |                     |                                                                                                                                                                                      |          |        |       |       |       |       |        |       |       |       |          |
| <b>Outcomes:</b>                               | <b>Type</b>   | <b>Sex-specific</b> | <b>Definition</b>                                                                                                                                                                    |          |        |       |       |       |       |        |       |       |       |          |
| Clinically High HDL cholesterol                | Dummy         | no                  | 1 if HDL-C $\geq$ 100 mg/dL, 0 otherwise                                                                                                                                             |          |        |       |       |       |       |        |       |       |       |          |
| Clinically High LDL cholesterol                | Dummy         | no                  | 1 if LDL-C $\geq$ 160 mg/dL, 0 otherwise                                                                                                                                             |          |        |       |       |       |       |        |       |       |       |          |
| Clinically High Total Cholesterol              | Dummy         | no                  | 1 if TC $\geq$ 240 mg/dL, 0 otherwise                                                                                                                                                |          |        |       |       |       |       |        |       |       |       |          |
| Clinically High Triglycerides                  | Dummy         | no                  | 1 if Triglycerides $\geq$ 200 mg/dL, 0 otherwise                                                                                                                                     |          |        |       |       |       |       |        |       |       |       |          |
|                                                |               |                     |                                                                                                                                                                                      |          |        |       |       |       |       |        |       |       |       |          |
| Clinically High ALT                            | Dummy         | yes                 | Females: 1 if ALT $\geq$ 25 IU/L, 0 otherwise; Males: 1 if ALT $\geq$ 40 IU/L, 0 otherwise                                                                                           |          |        |       |       |       |       |        |       |       |       |          |
| Clinically High AST                            | Dummy         | no                  | 1 if LDL-C $\geq$ 160 mg/dL, 0 otherwise                                                                                                                                             |          |        |       |       |       |       |        |       |       |       |          |
| Clinically High GGT                            | Dummy         | no                  | 1 if TC $\geq$ 240 mg/dL, 0 otherwise                                                                                                                                                |          |        |       |       |       |       |        |       |       |       |          |
|                                                |               |                     |                                                                                                                                                                                      |          |        |       |       |       |       |        |       |       |       |          |
| <b>Predictor:</b>                              | <b>Type</b>   | <b>Sex-specific</b> | <b>Definition</b>                                                                                                                                                                    |          |        |       |       |       |       |        |       |       |       |          |
| Reference level: Non-binge alcohol consumption | Dummy         | yes                 | Females: 1 if consume < 4 standard drinks on average over days drinking, 0 otherwise; Males: 1 if consume < 5 standard drinks on average over days drinking, 0 otherwise             |          |        |       |       |       |       |        |       |       |       |          |
| Level I alcohol consumption                    | Dummy         | yes                 | Females: 1 if consume [4,8) standard drinks on average over days drinking, 0 otherwise; Males: 1 if consume [5,10) standard drinks on average over days drinking, 0 otherwise        |          |        |       |       |       |       |        |       |       |       |          |
| Level II alcohol consumption                   | Dummy         | yes                 | Females: 1 if consume [8,12) standard drinks on average over days drinking, 0 otherwise; Males: 1 if consume [10,15) standard drinks on average over days drinking, 0 otherwise      |          |        |       |       |       |       |        |       |       |       |          |
| Level III alcohol consumption                  | Dummy         | yes                 | Females: 1 if consume $\geq$ 12 standard drinks on average over days drinking, 0 otherwise; Males: 1 if consume $\geq$ 15 standard drinks on average over days drinking, 0 otherwise |          |        |       |       |       |       |        |       |       |       |          |
|                                                |               |                     |                                                                                                                                                                                      |          |        |       |       |       |       |        |       |       |       |          |
| <b>Covariates:</b>                             | <b>Type</b>   | <b>Sex-specific</b> | <b>Definition</b>                                                                                                                                                                    |          |        |       |       |       |       |        |       |       |       |          |
| Age                                            | Continuous    | no                  | Age at protocol screening or admission as in-patient if admitted                                                                                                                     |          |        |       |       |       |       |        |       |       |       |          |
| Gender                                         | Dummy         | na                  | 1 if male, 0 if female                                                                                                                                                               |          |        |       |       |       |       |        |       |       |       |          |
| BMI                                            | Continuous    | no                  | body mass index                                                                                                                                                                      |          |        |       |       |       |       |        |       |       |       |          |
| Race                                           | Dummy         | no                  | 1 if specified race, 0 otherwise                                                                                                                                                     |          |        |       |       |       |       |        |       |       |       |          |
|                                                |               |                     |                                                                                                                                                                                      |          |        |       |       |       |       |        |       |       |       |          |
| <b>Abbreviations</b>                           |               |                     |                                                                                                                                                                                      |          |        |       |       |       |       |        |       |       |       |          |

|                                       |                                                                                                                            |  |  |  |  |  |  |  |  |  |  |
|---------------------------------------|----------------------------------------------------------------------------------------------------------------------------|--|--|--|--|--|--|--|--|--|--|
| CI Adjustment:                        | Bonferroni method for 21 tests with $qnorm(1-(.05/2*21))=3.038$                                                            |  |  |  |  |  |  |  |  |  |  |
| P value adjustment:                   | Bonferroni method for 21 tests                                                                                             |  |  |  |  |  |  |  |  |  |  |
| SE                                    | standard error of estimate                                                                                                 |  |  |  |  |  |  |  |  |  |  |
| OR                                    | odds ratio (since estimate is $\ln(OR)$ , $OR=EXP(\text{estimate})$ )                                                      |  |  |  |  |  |  |  |  |  |  |
| LCI                                   | lower confidence interval bound                                                                                            |  |  |  |  |  |  |  |  |  |  |
| UCI                                   | upper confidence interval bound                                                                                            |  |  |  |  |  |  |  |  |  |  |
| Hoslem-Lemeshow test adjusted P-value | Bonferroni method for 14 tests (7 tests, 2 multivariable analyses): Good fit if $P > .004$ Bonferroni adjusted threshold ) |  |  |  |  |  |  |  |  |  |  |

| eTable 3. Logistic Regression Results for Alcohol Binge Intake Frequency on Clinically High Lipid and LFT Levels |               |       |        |          |        |        |       |        |        |          |                                                  |        |        |        |
|------------------------------------------------------------------------------------------------------------------|---------------|-------|--------|----------|--------|--------|-------|--------|--------|----------|--------------------------------------------------|--------|--------|--------|
|                                                                                                                  |               |       |        |          |        |        |       |        |        |          | Adjustment: Bonferroni method for 42 comparisons |        |        |        |
| Predictors:                                                                                                      | Estimate      | SE    | Z      | Pr(> z ) | LCI    | UCI    | OR    | OR LCI | OR UCI | P value  | LCI                                              | UCI    | OR LCI | OR UCI |
| <b>Outcome: Clinically High HDL</b>                                                                              |               |       |        |          |        |        |       |        |        |          |                                                  |        |        |        |
| (Intercept)                                                                                                      | -1.359        | 0.652 | -2.086 | 3.70E-02 | -2.637 | -0.082 | 0.257 | 0.072  | 0.921  | 1.00E+00 | -3.472                                           | 0.753  | 0.031  | 2.123  |
| Count of days drinking at level I                                                                                | 0.022         | 0.006 | 3.92   | 8.84E-05 | 0.011  | 0.033  | 1.022 | 1.011  | 1.034  | 3.71E-03 | 0.004                                            | 0.040  | 1.004  | 1.041  |
| Count of days drinking at level II                                                                               | 0.024         | 0.005 | 4.497  | 6.89E-06 | 0.014  | 0.035  | 1.025 | 1.014  | 1.036  | 2.89E-04 | 0.007                                            | 0.042  | 1.007  | 1.043  |
| Count of days drinking at level III                                                                              | 0.032         | 0.007 | 4.634  | 3.59E-06 | 0.019  | 0.046  | 1.033 | 1.019  | 1.047  | 1.51E-04 | 0.010                                            | 0.055  | 1.010  | 1.056  |
| Total Drinks                                                                                                     | 0.000         | 0.000 | -0.612 | 5.41E-01 | -0.001 | 0.000  | 1.000 | 0.999  | 1.000  | 1.00E+00 | -0.001                                           | 0.001  | 0.999  | 1.001  |
| Age at admission                                                                                                 | 0.012         | 0.009 | 1.318  | 1.87E-01 | -0.006 | 0.029  | 1.012 | 0.994  | 1.030  | 1.00E+00 | -0.017                                           | 0.041  | 0.983  | 1.042  |
| Race: Black/ African-American                                                                                    | -0.058        | 0.197 | -0.294 | 7.69E-01 | -0.444 | 0.328  | 0.944 | 0.641  | 1.389  | 1.00E+00 | -0.696                                           | 0.581  | 0.498  | 1.787  |
| Race: Asian                                                                                                      | 0.069         | 0.647 | 0.107  | 9.15E-01 | -1.200 | 1.338  | 1.072 | 0.301  | 3.811  | 1.00E+00 | -2.029                                           | 2.167  | 0.131  | 8.735  |
| Race: American Indian/ Native American                                                                           | 0.358         | 1.133 | 0.316  | 7.52E-01 | -1.863 | 2.579  | 1.431 | 0.155  | 13.188 | 1.00E+00 | -3.314                                           | 4.031  | 0.036  | 56.318 |
| Multiracial                                                                                                      | -0.333        | 0.756 | -0.44  | 6.60E-01 | -1.815 | 1.150  | 0.717 | 0.163  | 3.157  | 1.00E+00 | -2.783                                           | 2.118  | 0.062  | 8.317  |
| Gender: Male                                                                                                     | -0.470        | 0.206 | -2.279 | 2.26E-02 | -0.874 | -0.066 | 0.625 | 0.417  | 0.936  | 9.49E-01 | -1.138                                           | 0.198  | 0.321  | 1.219  |
| BMI                                                                                                              | -0.097        | 0.022 | -4.336 | 1.45E-05 | -0.140 | -0.053 | 0.908 | 0.869  | 0.948  | 6.09E-04 | -0.169                                           | -0.024 | 0.845  | 0.976  |
| Null Deviance (df)                                                                                               | 915.82 (1518) |       |        |          |        |        |       |        |        |          |                                                  |        |        |        |
| Residual Deviance (df)                                                                                           | 796.01 (1507) |       |        |          |        |        |       |        |        |          |                                                  |        |        |        |
| Observations deleted due to missingness                                                                          | 0             |       |        |          |        |        |       |        |        |          |                                                  |        |        |        |
| AIC                                                                                                              | 820.01        |       |        |          |        |        |       |        |        |          |                                                  |        |        |        |
| Hoslem-Lemeshow Goodness of Fit: P-value                                                                         | > 0.99        |       |        |          |        |        |       |        |        |          |                                                  |        |        |        |
|                                                                                                                  |               |       |        |          |        |        |       |        |        |          | Adjustment: Bonferroni method for 42 comparisons |        |        |        |
| Predictors:                                                                                                      | Estimate      | SE    | Z      | Pr(> z ) | LCI    | UCI    | OR    | OR LCI | OR UCI | P value  | LCI                                              | UCI    | OR LCI | OR UCI |
| <b>Outcome: Clinically High LDL</b>                                                                              |               |       |        |          |        |        |       |        |        |          |                                                  |        |        |        |
| (Intercept)                                                                                                      | -7.220        | 0.788 | -9.163 | 2.00E-16 | -8.764 | -5.675 | 0.001 | 0.000  | 0.003  | 8.40E-15 | -9.773                                           | -4.666 | 0.000  | 0.009  |
| Count of days drinking at level I                                                                                | 0.011         | 0.007 | 1.63   | 1.03E-01 | -0.002 | 0.025  | 1.011 | 0.998  | 1.025  | 1.00E+00 | -0.011                                           | 0.034  | 0.989  | 1.034  |
| Count of days drinking at level II                                                                               | 0.020         | 0.008 | 2.582  | 9.84E-03 | 0.005  | 0.035  | 1.020 | 1.005  | 1.036  | 4.13E-01 | -0.005                                           | 0.045  | 0.995  | 1.046  |
| Count of days drinking at level III                                                                              | 0.032         | 0.012 | 2.787  | 5.33E-03 | 0.010  | 0.055  | 1.033 | 1.010  | 1.057  | 2.24E-01 | -0.005                                           | 0.070  | 0.995  | 1.073  |
| Total Drinks                                                                                                     | -0.001        | 0.001 | -2.019 | 4.35E-02 | -0.002 | 0.000  | 0.999 | 0.998  | 1.000  | 1.00E+00 | -0.003                                           | 0.001  | 0.997  | 1.001  |
| Age at admission                                                                                                 | 0.048         | 0.011 | 4.525  | 6.05E-06 | 0.027  | 0.069  | 1.050 | 1.028  | 1.072  | 2.54E-04 | 0.014                                            | 0.083  | 1.014  | 1.087  |
| Race: Black/ African-American                                                                                    | -0.168        | 0.239 | -0.703 | 4.82E-01 | -0.637 | 0.301  | 0.845 | 0.529  | 1.351  | 1.00E+00 | -0.943                                           | 0.607  | 0.389  | 1.835  |
| Race: Asian                                                                                                      | -0.321        | 1.039 | -0.309 | 7.57E-01 | -2.358 | 1.715  | 0.725 | 0.095  | 5.558  | 1.00E+00 | -3.689                                           | 3.047  | 0.025  | 21.043 |
| Race: American Indian/ Native American                                                                           | 0.139         | 1.114 | 0.125  | 9.01E-01 | -2.045 | 2.323  | 1.149 | 0.129  | 10.210 | 1.00E+00 | -3.472                                           | 3.751  | 0.031  | 42.563 |
| Multiracial                                                                                                      | -0.843        | 1.036 | -0.814 | 4.16E-01 | -2.874 | 1.188  | 0.430 | 0.056  | 3.280  | 1.00E+00 | -4.202                                           | 2.515  | 0.015  | 12.371 |
| Gender: Male                                                                                                     | 0.096         | 0.254 | 0.379  | 7.05E-01 | -0.402 | 0.594  | 1.101 | 0.669  | 1.812  | 1.00E+00 | -0.728                                           | 0.920  | 0.483  | 2.510  |
| BMI                                                                                                              | 0.073         | 0.020 | 3.635  | 2.78E-04 | 0.034  | 0.112  | 1.076 | 1.034  | 1.119  | 1.17E-02 | 0.008                                            | 0.138  | 1.008  | 1.148  |
| Null Deviance (df)                                                                                               | 654.25 (1509) |       |        |          |        |        |       |        |        |          |                                                  |        |        |        |
| Residual Deviance (df)                                                                                           | 593.65 (1498) |       |        |          |        |        |       |        |        |          |                                                  |        |        |        |
| Observations deleted due to missingness                                                                          | 9             |       |        |          |        |        |       |        |        |          |                                                  |        |        |        |
| AIC                                                                                                              | 617.650       |       |        |          |        |        |       |        |        |          |                                                  |        |        |        |



|                                                   |                                                         |           |          |                    |            |            |           |               |               |                |            |            |               |               |
|---------------------------------------------------|---------------------------------------------------------|-----------|----------|--------------------|------------|------------|-----------|---------------|---------------|----------------|------------|------------|---------------|---------------|
| Hoslem-Lemeshow Goodness of Fit: P-value          | > 0.99                                                  |           |          |                    |            |            |           |               |               |                |            |            |               |               |
|                                                   | <b>Adjustment: Bonferroni method for 42 comparisons</b> |           |          |                    |            |            |           |               |               |                |            |            |               |               |
| <b>Outcome: Clinically High Total Cholesterol</b> | <b>Estimate</b>                                         | <b>SE</b> | <b>Z</b> | <b>Pr(&gt; z )</b> | <b>LCI</b> | <b>UCI</b> | <b>OR</b> | <b>OR LCI</b> | <b>OR UCI</b> | <b>P value</b> | <b>LCI</b> | <b>UCI</b> | <b>OR LCI</b> | <b>OR UCI</b> |
| (Intercept)                                       | -5.085                                                  | 0.596     | -8.525   | 2.00E-16           | -6.254     | -3.916     | 0.006     | 0.002         | 0.020         | 8.40E-15       | -7.018     | -3.152     | 0.001         | 0.043         |
| Count of days drinking at level I                 | 0.019                                                   | 0.005     | 3.806    | 1.41E-04           | 0.009      | 0.029      | 1.020     | 1.009         | 1.030         | 5.92E-03       | 0.003      | 0.036      | 1.003         | 1.036         |
| Count of days drinking at level II                | 0.023                                                   | 0.005     | 4.32     | 1.56E-05           | 0.013      | 0.034      | 1.024     | 1.013         | 1.035         | 6.55E-04       | 0.006      | 0.041      | 1.006         | 1.042         |
| Count of days drinking at level III               | 0.031                                                   | 0.008     | 3.934    | 8.35E-05           | 0.016      | 0.046      | 1.031     | 1.016         | 1.047         | 3.51E-03       | 0.005      | 0.056      | 1.005         | 1.058         |
| Total Drinks                                      | -0.001                                                  | 0.000     | -1.909   | 5.63E-02           | -0.001     | 0.000      | 0.999     | 0.999         | 1.000         | 1.00E+00       | -0.002     | 0.000      | 0.998         | 1.000         |
| Age at admission                                  | 0.034                                                   | 0.008     | 4.164    | 3.13E-05           | 0.018      | 0.051      | 1.035     | 1.018         | 1.052         | 1.31E-03       | 0.008      | 0.061      | 1.008         | 1.063         |
| Race: Black/ African-American                     | -0.500                                                  | 0.190     | -2.633   | 8.47E-03           | -0.873     | -0.128     | 0.606     | 0.418         | 0.880         | 3.56E-01       | -1.116     | 0.116      | 0.328         | 1.123         |
| Race: Asian                                       | -0.396                                                  | 0.748     | -0.529   | 5.97E-01           | -1.861     | 1.069      | 0.673     | 0.156         | 2.914         | 1.00E+00       | -2.819     | 2.027      | 0.060         | 7.592         |
| Race: American Indian/ Native American            | -0.446                                                  | 1.115     | -0.399   | 6.90E-01           | -2.632     | 1.741      | 0.640     | 0.072         | 5.702         | 1.00E+00       | -4.061     | 3.170      | 0.017         | 23.804        |
| Multiracial                                       | -0.840                                                  | 0.752     | -1.117   | 2.64E-01           | -2.314     | 0.634      | 0.432     | 0.099         | 1.885         | 1.00E+00       | -3.277     | 1.597      | 0.038         | 4.939         |
| Gender: Male                                      | -0.167                                                  | 0.195     | -0.858   | 3.91E-01           | -0.549     | 0.215      | 0.846     | 0.577         | 1.239         | 1.00E+00       | -0.799     | 0.464      | 0.450         | 1.591         |
| BMI                                               | 0.034                                                   | 0.017     | 2.042    | 4.11E-02           | 0.001      | 0.067      | 1.035     | 1.001         | 1.070         | 1.00E+00       | -0.020     | 0.089      | 0.980         | 1.093         |
| Null Deviance (df)                                | 974.59 (1517)                                           |           |          |                    |            |            |           |               |               |                |            |            |               |               |
| Residual Deviance (df)                            | 879.8 (1506)                                            |           |          |                    |            |            |           |               |               |                |            |            |               |               |
| Observations deleted due to missingness           | 1                                                       |           |          |                    |            |            |           |               |               |                |            |            |               |               |
| AIC                                               | 903.80                                                  |           |          |                    |            |            |           |               |               |                |            |            |               |               |
| Hoslem-Lemeshow Goodness of Fit: P-value          | > 0.99                                                  |           |          |                    |            |            |           |               |               |                |            |            |               |               |
|                                                   | <b>Adjustment: Bonferroni method for 42 comparisons</b> |           |          |                    |            |            |           |               |               |                |            |            |               |               |
| <b>Outcome: Clinically High Triglycerides</b>     | <b>Estimate</b>                                         | <b>SE</b> | <b>Z</b> | <b>Pr(&gt; z )</b> | <b>LCI</b> | <b>UCI</b> | <b>OR</b> | <b>OR LCI</b> | <b>OR UCI</b> | <b>P value</b> | <b>LCI</b> | <b>UCI</b> | <b>OR LCI</b> | <b>OR UCI</b> |
| (Intercept)                                       | -6.256                                                  | 0.632     | -9.899   | 2.00E-16           | -7.495     | -5.017     | 0.002     | 0.001         | 0.007         | 8.40E-15       | -8.305     | -4.208     | 0.000         | 0.015         |
| Count of days drinking at level I                 | 0.018                                                   | 0.005     | 3.383    | 7.16E-04           | 0.007      | 0.028      | 1.018     | 1.007         | 1.028         | 3.01E-02       | 0.001      | 0.035      | 1.001         | 1.035         |
| Count of days drinking at level II                | 0.015                                                   | 0.006     | 2.615    | 8.93E-03           | 0.004      | 0.026      | 1.015     | 1.004         | 1.026         | 3.75E-01       | -0.003     | 0.033      | 0.997         | 1.033         |
| Count of days drinking at level III               | 0.018                                                   | 0.008     | 2.356    | 1.85E-02           | 0.003      | 0.034      | 1.019     | 1.003         | 1.034         | 7.77E-01       | -0.007     | 0.044      | 0.993         | 1.045         |
| Total Drinks                                      | 0.000                                                   | 0.000     | -0.858   | 3.91E-01           | -0.001     | 0.000      | 1.000     | 0.999         | 1.000         | 1.00E+00       | -0.001     | 0.001      | 0.999         | 1.001         |
| Age at admission                                  | 0.005                                                   | 0.008     | 0.574    | 5.66E-01           | -0.012     | 0.021      | 1.005     | 0.988         | 1.022         | 1.00E+00       | -0.023     | 0.032      | 0.978         | 1.033         |
| Race: Black/ African-American                     | -0.850                                                  | 0.209     | -4.074   | 4.62E-05           | -1.259     | -0.441     | 0.427     | 0.284         | 0.643         | 1.94E-03       | -1.527     | -0.174     | 0.217         | 0.840         |
| Race: Asian                                       | 0.125                                                   | 0.561     | 0.222    | 8.24E-01           | -0.974     | 1.223      | 1.133     | 0.377         | 3.399         | 1.00E+00       | -1.692     | 1.942      | 0.184         | 6.970         |
| Race: American Indian/ Native American            | 0.258                                                   | 1.118     | 0.23     | 8.18E-01           | -1.934     | 2.449      | 1.294     | 0.145         | 11.573        | 1.00E+00       | -3.366     | 3.881      | 0.035         | 48.469        |
| Multiracial                                       | -0.861                                                  | 0.750     | -1.148   | 2.51E-01           | -2.332     | 0.609      | 0.423     | 0.097         | 1.839         | 1.00E+00       | -3.294     | 1.571      | 0.037         | 4.810         |
| Gender: Male                                      | 0.687                                                   | 0.229     | 3        | 2.70E-03           | 0.238      | 1.136      | 1.988     | 1.269         | 3.114         | 1.14E-01       | -0.055     | 1.429      | 0.946         | 4.175         |
| BMI                                               | 0.105                                                   | 0.017     | 6.196    | 5.79E-10           | 0.072      | 0.139      | 1.111     | 1.075         | 1.149         | 2.43E-08       | 0.050      | 0.160      | 1.051         | 1.174         |
| Null Deviance (df)                                | 901.83 (1518)                                           |           |          |                    |            |            |           |               |               |                |            |            |               |               |
| Residual Deviance (df)                            | 815.27 (1507)                                           |           |          |                    |            |            |           |               |               |                |            |            |               |               |
| Observations deleted due to missingness           | 0                                                       |           |          |                    |            |            |           |               |               |                |            |            |               |               |
| AIC                                               | 839.30                                                  |           |          |                    |            |            |           |               |               |                |            |            |               |               |
| Hoslem-Lemeshow Goodness of Fit: P-value          | > 0.99                                                  |           |          |                    |            |            |           |               |               |                |            |            |               |               |
|                                                   | <b>Adjustment: Bonferroni method for 42 comparisons</b> |           |          |                    |            |            |           |               |               |                |            |            |               |               |
| <b>Outcome: Clinically High ALT</b>               | <b>Estimate</b>                                         | <b>SE</b> | <b>Z</b> | <b>Pr(&gt; z )</b> | <b>LCI</b> | <b>UCI</b> | <b>OR</b> | <b>OR LCI</b> | <b>OR UCI</b> | <b>P value</b> | <b>LCI</b> | <b>UCI</b> | <b>OR LCI</b> | <b>OR UCI</b> |

|                                                         |                 |           |          |                    |            |            |           |               |               |                |            |            |               |               |
|---------------------------------------------------------|-----------------|-----------|----------|--------------------|------------|------------|-----------|---------------|---------------|----------------|------------|------------|---------------|---------------|
| (Intercept)                                             | -2.209          | 0.361     | -6.123   | 9.17E-10           | -2.917     | -1.502     | 0.110     | 0.054         | 0.223         | 3.85E-08       | -3.379     | -1.040     | 0.034         | 0.353         |
| Count of days drinking at level I                       | 0.019           | 0.003     | 5.701    | 1.19E-08           | 0.013      | 0.026      | 1.019     | 1.013         | 1.026         | 5.00E-07       | 0.008      | 0.030      | 1.008         | 1.031         |
| Count of days drinking at level II                      | 0.019           | 0.004     | 5.524    | 3.31E-08           | 0.013      | 0.026      | 1.020     | 1.013         | 1.027         | 1.39E-06       | 0.008      | 0.031      | 1.008         | 1.031         |
| Count of days drinking at level III                     | 0.028           | 0.005     | 5.389    | 7.08E-08           | 0.018      | 0.038      | 1.028     | 1.018         | 1.038         | 2.97E-06       | 0.011      | 0.044      | 1.011         | 1.045         |
| Total Drinks                                            | 0.000           | 0.000     | -0.657   | 5.11E-01           | -0.001     | 0.000      | 1.000     | 0.999         | 1.000         | 1.00E+00       | -0.001     | 0.001      | 0.999         | 1.001         |
| Age at admission                                        | 0.011           | 0.005     | 2.143    | 3.21E-02           | 0.001      | 0.021      | 1.011     | 1.001         | 1.022         | 1.00E+00       | -0.006     | 0.028      | 0.994         | 1.028         |
| Race: Black/ African-American                           | -0.858          | 0.126     | -6.831   | 8.41E-12           | -1.104     | -0.612     | 0.424     | 0.332         | 0.542         | 3.53E-10       | -1.265     | -0.451     | 0.282         | 0.637         |
| Race: Asian                                             | -0.103          | 0.343     | -0.301   | 7.64E-01           | -0.777     | 0.570      | 0.902     | 0.460         | 1.768         | 1.00E+00       | -1.217     | 1.010      | 0.296         | 2.745         |
| Race: American Indian/ Native American                  | -1.130          | 0.875     | -1.291   | 1.97E-01           | -2.846     | 0.586      | 0.323     | 0.058         | 1.796         | 1.00E+00       | -3.967     | 1.707      | 0.019         | 5.513         |
| Multiracial                                             | -0.433          | 0.381     | -1.138   | 2.55E-01           | -1.180     | 0.313      | 0.648     | 0.307         | 1.368         | 1.00E+00       | -1.668     | 0.801      | 0.189         | 2.228         |
| Gender: Male                                            | -0.393          | 0.128     | -3.078   | 2.08E-03           | -0.643     | -0.143     | 0.675     | 0.526         | 0.867         | 8.74E-02       | -0.806     | 0.021      | 0.447         | 1.021         |
| BMI                                                     | 0.032           | 0.012     | 2.738    | 6.18E-03           | 0.009      | 0.054      | 1.032     | 1.009         | 1.056         | 2.60E-01       | -0.006     | 0.069      | 0.994         | 1.072         |
| Null Deviance (df)                                      | 1983 (1518)     |           |          |                    |            |            |           |               |               |                |            |            |               |               |
| Residual Deviance (df)                                  | 1732.3 (1507)   |           |          |                    |            |            |           |               |               |                |            |            |               |               |
| Observations deleted due to missingness                 | 0               |           |          |                    |            |            |           |               |               |                |            |            |               |               |
| AIC                                                     | 1756.30         |           |          |                    |            |            |           |               |               |                |            |            |               |               |
| Hoslem-Lemeshow Goodness of Fit: P-value                | > 0.99          |           |          |                    |            |            |           |               |               |                |            |            |               |               |
| <b>Adjustment: Bonferroni method for 42 comparisons</b> |                 |           |          |                    |            |            |           |               |               |                |            |            |               |               |
| <b>Outcome: Clinically High AST</b>                     | <b>Estimate</b> | <b>SE</b> | <b>Z</b> | <b>Pr(&gt; z )</b> | <b>LCI</b> | <b>UCI</b> | <b>OR</b> | <b>OR LCI</b> | <b>OR UCI</b> | <b>P value</b> | <b>LCI</b> | <b>UCI</b> | <b>OR LCI</b> | <b>OR UCI</b> |
| (Intercept)                                             | -2.838          | 0.429     | -6.617   | 3.67E-11           | -3.678     | -1.997     | 0.059     | 0.025         | 0.136         | 1.54E-09       | -4.228     | -1.448     | 0.015         | 0.235         |
| Count of days drinking at level I                       | 0.026           | 0.004     | 7.262    | 3.80E-13           | 0.019      | 0.033      | 1.027     | 1.019         | 1.034         | 1.60E-11       | 0.015      | 0.038      | 1.015         | 1.039         |
| Count of days drinking at level II                      | 0.027           | 0.004     | 7.365    | 1.77E-13           | 0.020      | 0.035      | 1.028     | 1.020         | 1.035         | 7.43E-12       | 0.015      | 0.039      | 1.015         | 1.040         |
| Count of days drinking at level III                     | 0.035           | 0.005     | 6.609    | 3.87E-11           | 0.024      | 0.045      | 1.035     | 1.025         | 1.046         | 1.63E-09       | 0.018      | 0.052      | 1.018         | 1.053         |
| Total Drinks                                            | 0.000           | 0.000     | -1.397   | 1.63E-01           | -0.001     | 0.000      | 1.000     | 0.999         | 1.000         | 1.00E+00       | -0.001     | 0.000      | 0.999         | 1.000         |
| Age at admission                                        | 0.032           | 0.006     | 5.443    | 5.24E-08           | 0.020      | 0.043      | 1.032     | 1.020         | 1.044         | 2.20E-06       | 0.013      | 0.050      | 1.013         | 1.052         |
| Race: Black/ African-American                           | -0.918          | 0.138     | -6.651   | 2.92E-11           | -1.188     | -0.647     | 0.399     | 0.305         | 0.524         | 1.23E-09       | -1.365     | -0.470     | 0.255         | 0.625         |
| Race: Asian                                             | -0.454          | 0.467     | -0.972   | 3.31E-01           | -1.369     | 0.461      | 0.635     | 0.254         | 1.586         | 1.00E+00       | -1.967     | 1.059      | 0.140         | 2.884         |
| Race: American Indian/ Native American                  | -0.705          | 0.894     | -0.788   | 4.31E-01           | -2.458     | 1.048      | 0.494     | 0.086         | 2.853         | 1.00E+00       | -3.604     | 2.194      | 0.027         | 8.973         |
| Multiracial                                             | -0.847          | 0.470     | -1.803   | 7.13E-02           | -1.767     | 0.074      | 0.429     | 0.171         | 1.076         | 1.00E+00       | -2.369     | 0.675      | 0.094         | 1.965         |
| Gender: Male                                            | 0.533           | 0.148     | 3.616    | 2.99E-04           | 0.244      | 0.823      | 1.705     | 1.277         | 2.276         | 1.26E-02       | 0.055      | 1.012      | 1.057         | 2.750         |
| BMI                                                     | -0.023          | 0.013     | -1.704   | 8.84E-02           | -0.049     | 0.003      | 0.977     | 0.952         | 1.003         | 1.00E+00       | -0.067     | 0.021      | 0.935         | 1.021         |
| Null Deviance (df)                                      | 1825.3 (1516)   |           |          |                    |            |            |           |               |               |                |            |            |               |               |
| Residual Deviance (df)                                  | 1462.9 (1505)   |           |          |                    |            |            |           |               |               |                |            |            |               |               |
| Observations deleted due to missingness                 | 2               |           |          |                    |            |            |           |               |               |                |            |            |               |               |
| AIC                                                     | 1486.90         |           |          |                    |            |            |           |               |               |                |            |            |               |               |
| Hoslem-Lemeshow Goodness of Fit: P-value                | > 0.99          |           |          |                    |            |            |           |               |               |                |            |            |               |               |
| <b>Adjustment: Bonferroni method for 42 comparisons</b> |                 |           |          |                    |            |            |           |               |               |                |            |            |               |               |
| <b>Outcome: Clinically High GGT</b>                     | <b>Estimate</b> | <b>SE</b> | <b>Z</b> | <b>Pr(&gt; z )</b> | <b>LCI</b> | <b>UCI</b> | <b>OR</b> | <b>OR LCI</b> | <b>OR UCI</b> | <b>P value</b> | <b>LCI</b> | <b>UCI</b> | <b>OR LCI</b> | <b>OR UCI</b> |
| (Intercept)                                             | -4.207          | 0.404     | -10.414  | 2.00E-16           | -4.999     | -3.415     | 0.015     | 0.007         | 0.033         | 8.40E-15       | -5.516     | -2.898     | 0.004         | 0.055         |
| Count of days drinking at level I                       | 0.022           | 0.004     | 5.661    | 1.50E-08           | 0.014      | 0.029      | 1.022     | 1.014         | 1.030         | 6.30E-07       | 0.009      | 0.034      | 1.009         | 1.035         |
| Count of days drinking at level II                      | 0.027           | 0.004     | 6.041    | 1.53E-09           | 0.018      | 0.036      | 1.028     | 1.019         | 1.037         | 6.43E-08       | 0.013      | 0.042      | 1.013         | 1.043         |
| Count of days drinking at level III                     | 0.032           | 0.007     | 4.657    | 3.20E-06           | 0.019      | 0.046      | 1.033     | 1.019         | 1.047         | 1.34E-04       | 0.010      | 0.054      | 1.010         | 1.056         |

|                                                            |               |                     |                                                                                                                                                                                           |          |        |       |       |       |       |          |        |       |       |        |
|------------------------------------------------------------|---------------|---------------------|-------------------------------------------------------------------------------------------------------------------------------------------------------------------------------------------|----------|--------|-------|-------|-------|-------|----------|--------|-------|-------|--------|
| Total Drinks                                               | 0.000         | 0.000               | -0.181                                                                                                                                                                                    | 8.57E-01 | -0.001 | 0.001 | 1.000 | 0.999 | 1.001 | 1.00E+00 | -0.001 | 0.001 | 0.999 | 1.001  |
| Age at admission                                           | 0.033         | 0.005               | 6.052                                                                                                                                                                                     | 1.43E-09 | 0.022  | 0.043 | 1.033 | 1.022 | 1.044 | 6.01E-08 | 0.015  | 0.050 | 1.015 | 1.051  |
| Race: Black/ African-American                              | 0.188         | 0.131               | 1.443                                                                                                                                                                                     | 1.49E-01 | -0.067 | 0.444 | 1.207 | 0.935 | 1.559 | 1.00E+00 | -0.235 | 0.611 | 0.791 | 1.843  |
| Race: Asian                                                | 0.004         | 0.361               | 0.012                                                                                                                                                                                     | 9.90E-01 | -0.703 | 0.712 | 1.004 | 0.495 | 2.038 | 1.00E+00 | -1.166 | 1.175 | 0.312 | 3.237  |
| Race: American Indian/ Native American                     | -0.365        | 0.840               | -0.434                                                                                                                                                                                    | 6.64E-01 | -2.010 | 1.281 | 0.695 | 0.134 | 3.600 | 1.00E+00 | -3.085 | 2.356 | 0.046 | 10.553 |
| Multiracial                                                | -0.261        | 0.398               | -0.657                                                                                                                                                                                    | 5.11E-01 | -1.041 | 0.518 | 0.770 | 0.353 | 1.679 | 1.00E+00 | -1.551 | 1.028 | 0.212 | 2.796  |
| Gender: Male                                               | 0.879         | 0.133               | 6.601                                                                                                                                                                                     | 4.08E-11 | 0.618  | 1.140 | 2.408 | 1.855 | 3.127 | 1.71E-09 | 0.447  | 1.311 | 1.564 | 3.709  |
| BMI                                                        | 0.057         | 0.013               | 4.48                                                                                                                                                                                      | 7.46E-06 | 0.032  | 0.081 | 1.058 | 1.032 | 1.085 | 3.13E-04 | 0.016  | 0.098 | 1.016 | 1.102  |
|                                                            |               |                     |                                                                                                                                                                                           |          |        |       |       |       |       |          |        |       |       |        |
| Null Deviance (df)                                         | 2080.7 (1518) |                     |                                                                                                                                                                                           |          |        |       |       |       |       |          |        |       |       |        |
| Residual Deviance (df)                                     | 1577.5 (1507) |                     |                                                                                                                                                                                           |          |        |       |       |       |       |          |        |       |       |        |
| Observations deleted due to missingness                    | 0             |                     |                                                                                                                                                                                           |          |        |       |       |       |       |          |        |       |       |        |
| AIC                                                        | 1601.50       |                     |                                                                                                                                                                                           |          |        |       |       |       |       |          |        |       |       |        |
| Hoslem-Lemeshow Goodness of Fit: P-value                   | 0.10          |                     |                                                                                                                                                                                           |          |        |       |       |       |       |          |        |       |       |        |
|                                                            |               |                     |                                                                                                                                                                                           |          |        |       |       |       |       |          |        |       |       |        |
|                                                            |               |                     |                                                                                                                                                                                           |          |        |       |       |       |       |          |        |       |       |        |
| NOTES:                                                     |               |                     |                                                                                                                                                                                           |          |        |       |       |       |       |          |        |       |       |        |
| <b>Outcomes:</b>                                           | <b>Type</b>   | <b>Sex-specific</b> | <b>Definition</b>                                                                                                                                                                         |          |        |       |       |       |       |          |        |       |       |        |
| Clinically High HDL cholesterol                            | Dummy         | no                  | 1 if HDL-C $\geq$ 100 mg/dL, 0 otherwise                                                                                                                                                  |          |        |       |       |       |       |          |        |       |       |        |
| Clinically High LDL cholesterol                            | Dummy         | no                  | 1 if LDL-C $\geq$ 160 mg/dL, 0 otherwise                                                                                                                                                  |          |        |       |       |       |       |          |        |       |       |        |
| Clinically High Total Cholesterol                          | Dummy         | no                  | 1 if TC $\geq$ 240 mg/dL, 0 otherwise                                                                                                                                                     |          |        |       |       |       |       |          |        |       |       |        |
| Clinically High Triglycerides                              | Dummy         | no                  | 1 if Triglycerides $\geq$ 200 mg/dL, 0 otherwise                                                                                                                                          |          |        |       |       |       |       |          |        |       |       |        |
|                                                            |               |                     |                                                                                                                                                                                           |          |        |       |       |       |       |          |        |       |       |        |
| Clinically High ALT                                        | Dummy         | yes                 | Females: 1 if ALT $\geq$ 25 IU/L, 0 otherwise; Males: 1 if ALT $\geq$ 40 IU/L, 0 otherwise                                                                                                |          |        |       |       |       |       |          |        |       |       |        |
| Clinically High AST                                        | Dummy         | no                  | 1 if LDL-C $\geq$ 160 mg/dL, 0 otherwise                                                                                                                                                  |          |        |       |       |       |       |          |        |       |       |        |
| Clinically High GGT                                        | Dummy         | no                  | 1 if TC $\geq$ 240 mg/dL, 0 otherwise                                                                                                                                                     |          |        |       |       |       |       |          |        |       |       |        |
|                                                            |               |                     |                                                                                                                                                                                           |          |        |       |       |       |       |          |        |       |       |        |
| <b>Predictor:</b>                                          | <b>Type</b>   | <b>Sex-specific</b> | <b>Definition</b>                                                                                                                                                                         |          |        |       |       |       |       |          |        |       |       |        |
| Reference level: Count of days drinking at non-binge level | Continuous    | yes                 | Days drinking at non-binge: for Females: < 4 standard drinks on average over days drinking, 0 otherwise; Males: < 5 standard drinks on average over days drinking, 0 otherwise            |          |        |       |       |       |       |          |        |       |       |        |
| Count of days drinking at level I                          | Continuous    | yes                 | Days drinking at level I: for Females: [4,8) standard drinks on average over days drinking, 0 otherwise; Males: [5,10) standard drinks on average over days drinking, 0 otherwise         |          |        |       |       |       |       |          |        |       |       |        |
| Count of days drinking at level II                         | Continuous    | yes                 | Days drinking at level II: for Females: [8,12) standard drinks on average over days drinking, 0 otherwise; Males: [10,15) standard drinks on average over days drinking, 0 otherwise      |          |        |       |       |       |       |          |        |       |       |        |
| Count of days drinking at level III                        | Continuous    | yes                 | Days drinking at level II: for Females: $\geq$ 12 standard drinks on average over days drinking, 0 otherwise; Males: $\geq$ 15 standard drinks on average over days drinking, 0 otherwise |          |        |       |       |       |       |          |        |       |       |        |
|                                                            |               |                     |                                                                                                                                                                                           |          |        |       |       |       |       |          |        |       |       |        |
| <b>Covariates:</b>                                         | <b>Type</b>   | <b>Sex-specific</b> | <b>Definition</b>                                                                                                                                                                         |          |        |       |       |       |       |          |        |       |       |        |
| Total Drinks                                               | Continuous    | no                  | Number of standard drinks consumed in 90 days prior to screening/ admission per Time Line FollowBack                                                                                      |          |        |       |       |       |       |          |        |       |       |        |
| Age                                                        | Continuous    | no                  | Age at protocol screening or admission as in-patient if admitted                                                                                                                          |          |        |       |       |       |       |          |        |       |       |        |
| Gender                                                     | Dummy         | na                  | 1 if male, 0 if female                                                                                                                                                                    |          |        |       |       |       |       |          |        |       |       |        |
| BMI                                                        | Continuous    | no                  | body mass index                                                                                                                                                                           |          |        |       |       |       |       |          |        |       |       |        |
| Race                                                       | Dummy         | no                  | 1 if specified race, 0 otherwise                                                                                                                                                          |          |        |       |       |       |       |          |        |       |       |        |

|                       |                                                                       |  |  |  |  |  |  |  |  |  |  |  |  |  |
|-----------------------|-----------------------------------------------------------------------|--|--|--|--|--|--|--|--|--|--|--|--|--|
|                       |                                                                       |  |  |  |  |  |  |  |  |  |  |  |  |  |
| <b>Abbreviations:</b> |                                                                       |  |  |  |  |  |  |  |  |  |  |  |  |  |
| CI Adjustment:        | Bonferroni method for 21 tests with $qnorm(1-(.05/2*21))=3.038$       |  |  |  |  |  |  |  |  |  |  |  |  |  |
| P value adjustment:   | Bonferroni method for 21 tests                                        |  |  |  |  |  |  |  |  |  |  |  |  |  |
| SE                    | standard error of estimate                                            |  |  |  |  |  |  |  |  |  |  |  |  |  |
| OR                    | odds ratio (since estimate is $\ln(OR)$ , $OR=EXP(\text{estimate})$ ) |  |  |  |  |  |  |  |  |  |  |  |  |  |
| LCI                   | lower confidence interval bound                                       |  |  |  |  |  |  |  |  |  |  |  |  |  |
| UCI                   | upper confidence interval bound                                       |  |  |  |  |  |  |  |  |  |  |  |  |  |
